# Supplementary material
Source: publisher figshare collection journal article supplement (https://acs.figshare.com/ndownloader/files/16191281)
Supplement: Supplementary file 1 [file 16191281]

## Supporting Information

### Highly Active Pt<sub>3</sub>Sn {110} Excavated Nanocube Cocatalysts for Photocatalytic Hydrogen Production

Juan Yao<sup>1#</sup>, Yaru Zheng<sup>1#</sup>, Xin Jia<sup>2</sup>, Lixuan Duan<sup>1</sup>, Qiang Wu<sup>1\*</sup>, Cunping Huang<sup>3</sup>, Wei  
An<sup>2\*</sup>, Qunjie Xu<sup>1,4</sup>, Weifeng Yao<sup>1,4\*</sup>

<sup>1</sup>Shanghai Key Laboratory of Materials Protection and Advanced Materials in Electric Power, College of Environmental & Chemical Engineering, Shanghai University of Electric Power, Shanghai, P. R. China. <sup>2</sup>College of Chemistry and Chemical Engineering, Shanghai University of Engineering Science, Songjiang District, Shanghai 201620, P. R. China. <sup>3</sup>Aviation Fuels Research Laboratory, Federal Aviation Administration William J. Hughes Technical Center, Atlantic City International Airport, Atlantic City, NJ 08405, U.S.A. <sup>4</sup>Shanghai Institute of Pollution Control and Ecological Security, Shanghai, P. R. China.

**\*Corresponding Authors:** [yaoweifeng@shiep.edu.cn](mailto:yaoweifeng@shiep.edu.cn) and [weian@sues.edu.cn](mailto:weian@sues.edu.cn) and [Qiangwu@shiep.edu.cn](mailto:Qiangwu@shiep.edu.cn)

**#**Juan Yao and Yaru Zheng contributed equally to this study and share first authorship

## Experimental

### Materials

Platinum (II) acetylacetonate ( $\text{Pt}(\text{acac})_2$ ) was purchased from Aladdin Industrial Corporation. Tin(II) chloride dehydrate ( $\text{SnCl}_2 \cdot 2\text{H}_2\text{O}$ ) with purity greater than 98% was purchased from Sinopharm Chemical Reagent (Shanghai, China). Polyvinylpyrrolidone (PVP) was purchased from Shanghai Zhanyun Chemical Co., Ltd. Cadmium sulfide (CdS) was purchased from Sinopharm Chemical Reagent (Shanghai, China). Dimethylformamide (DMF) was purchased from Sinopharm Chemical Reagent (Shanghai, China). 5wt.% Nafion solution and sodium borohydride ( $\text{NaBH}_4$ ) were purchased from Alfa Aesar. Tert-butylamine (TBA), acetone and ethanol solvents were obtained from Sinopharm Chemical Reagent Co. Ltd. All reagents used in this research were commercially available and used without further purification. Deionized water was obtained from an ULUPURE Ultra-pure water generator.

### Preparation of $\text{Pt}_3\text{Sn}/\text{CdS}$ and $\text{Pt}/\text{CdS}$ photocatalysts

In a typical run, 2.5 mg prepared  $\text{Pt}_3\text{Sn}$  alloy nanoparticles were added into 100 mL deionized water containing 0.5000 g commercial CdS photocatalyst. The resulting suspension was stirred for 2 hours at room temperature. The mixture was then centrifuged at 8000 rpm for 3 minutes. Finally, the obtained powder was dried overnight in a vacuum oven at 333 K before grinding. It should be pointed out that PVP plays an important role in the synthesis of an excavated structure. However, PVP molecules strongly adsorbed onto the surface of  $\text{Pt}_3\text{Sn}$  and Pt nanoparticles are detrimental when the noble metal nanoparticles are used as cocatalysts. The complete removal of PVP from the  $\text{Pt}_3\text{Sn}/\text{CdS}$  and  $\text{Pt}/\text{CdS}$  was accomplished using the  $\text{NaBH}_4$  and TBA treatments previously developed by our group.<sup>1</sup> The XRD pattern shows that the crystal structure of the  $\text{Pt}_3\text{Sn}/\text{CdS}$  composite are the same before and after the PVP removal process (Figure S1 of the Supporting Information).

### 2.3. Catalyst characterizations

Transmission electron microscopic (TEM) images and high-resolution transmission electron microscopic (HRTEM) images, together with selected area energy dispersive X-ray spectroscopy (EDS) were carried out using a field-emission transmission electron microscope (JEM-2100F) at

an accelerating voltage of 200 kV. The fluorescence spectrum was recorded with a fluorescence detector (FLS980, Edinburgh). Pt and Sn concentrations and alloy loadings were all determined by inductively coupled plasma atomic emission spectroscopy (ICP-AES Agilent 710). X-ray diffraction (XRD) patterns were collected on a BRUKER-D8 X-ray diffractometer using Cu K $\alpha$  radiation. An ESCALAB250Xi spectrometer equipped with a monochromatized Al K $\alpha$  (1486.6 eV) source was used for XPS analyses. Brunauer-Emmett-Teller (BET) specific surface areas were determined at 77 K on a Micrometrics Gemini VII 2390 surface area meter. UV-Vis absorption and diffusion reflectance spectra were recorded using a UV-Vis spectrometer (UV-2550, Shimadzu, Japan) and were then converted to absorption spectra based on the standard Kubelka–Munk method. BaSO<sub>4</sub> was used as a reflectance standard in the UV-Vis light diffuse reflectance experiments. All the electrochemical and photoelectrochemical measurements were performed in a typical three-electrode system using a CHI660E electrochemical station (CH Instruments, Inc., Shanghai).

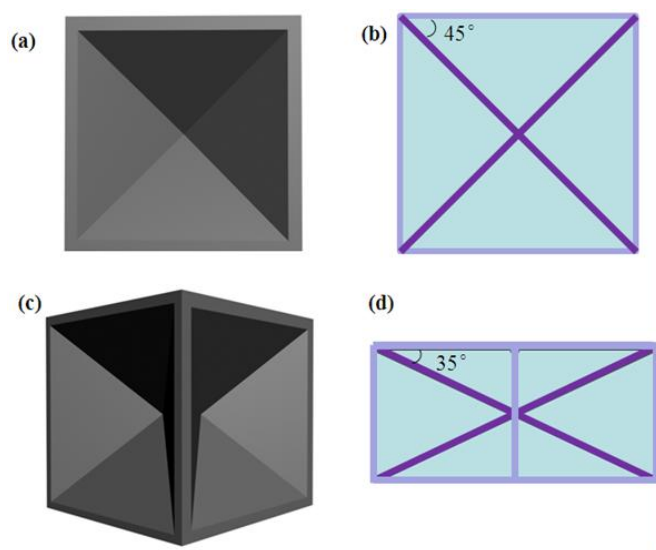

Scheme S1. Two schematic models of an excavated Pt<sub>3</sub>Sn metal unit cell<sup>2</sup>.

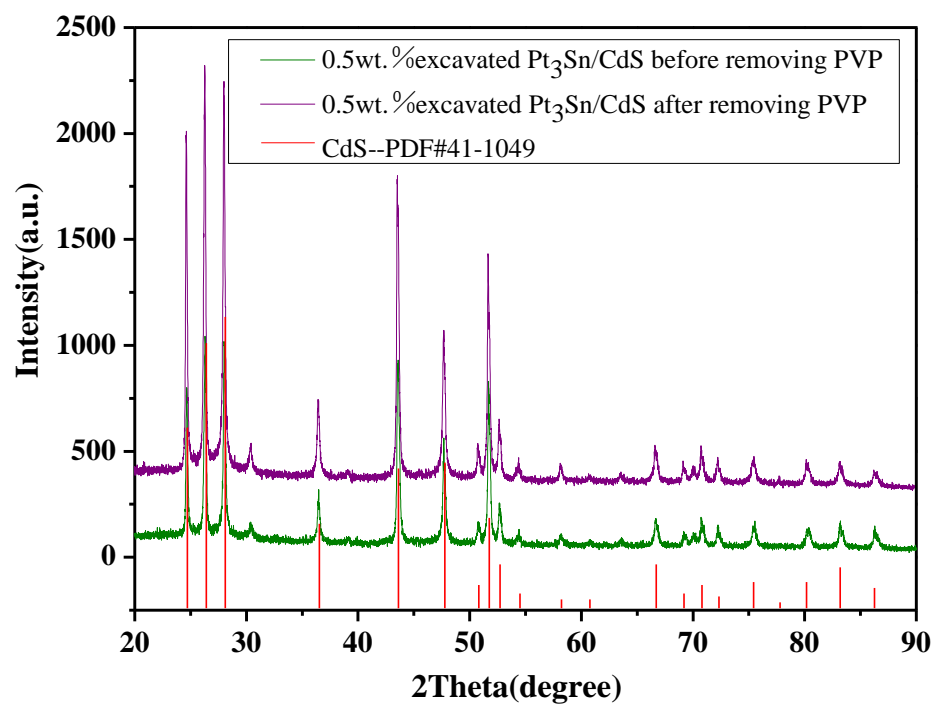

Figure S1. XRD patterns of 0.5 wt.% excavated Pt<sub>3</sub>Sn nanocubes/CdS photocatalyst before and after PVP removal.

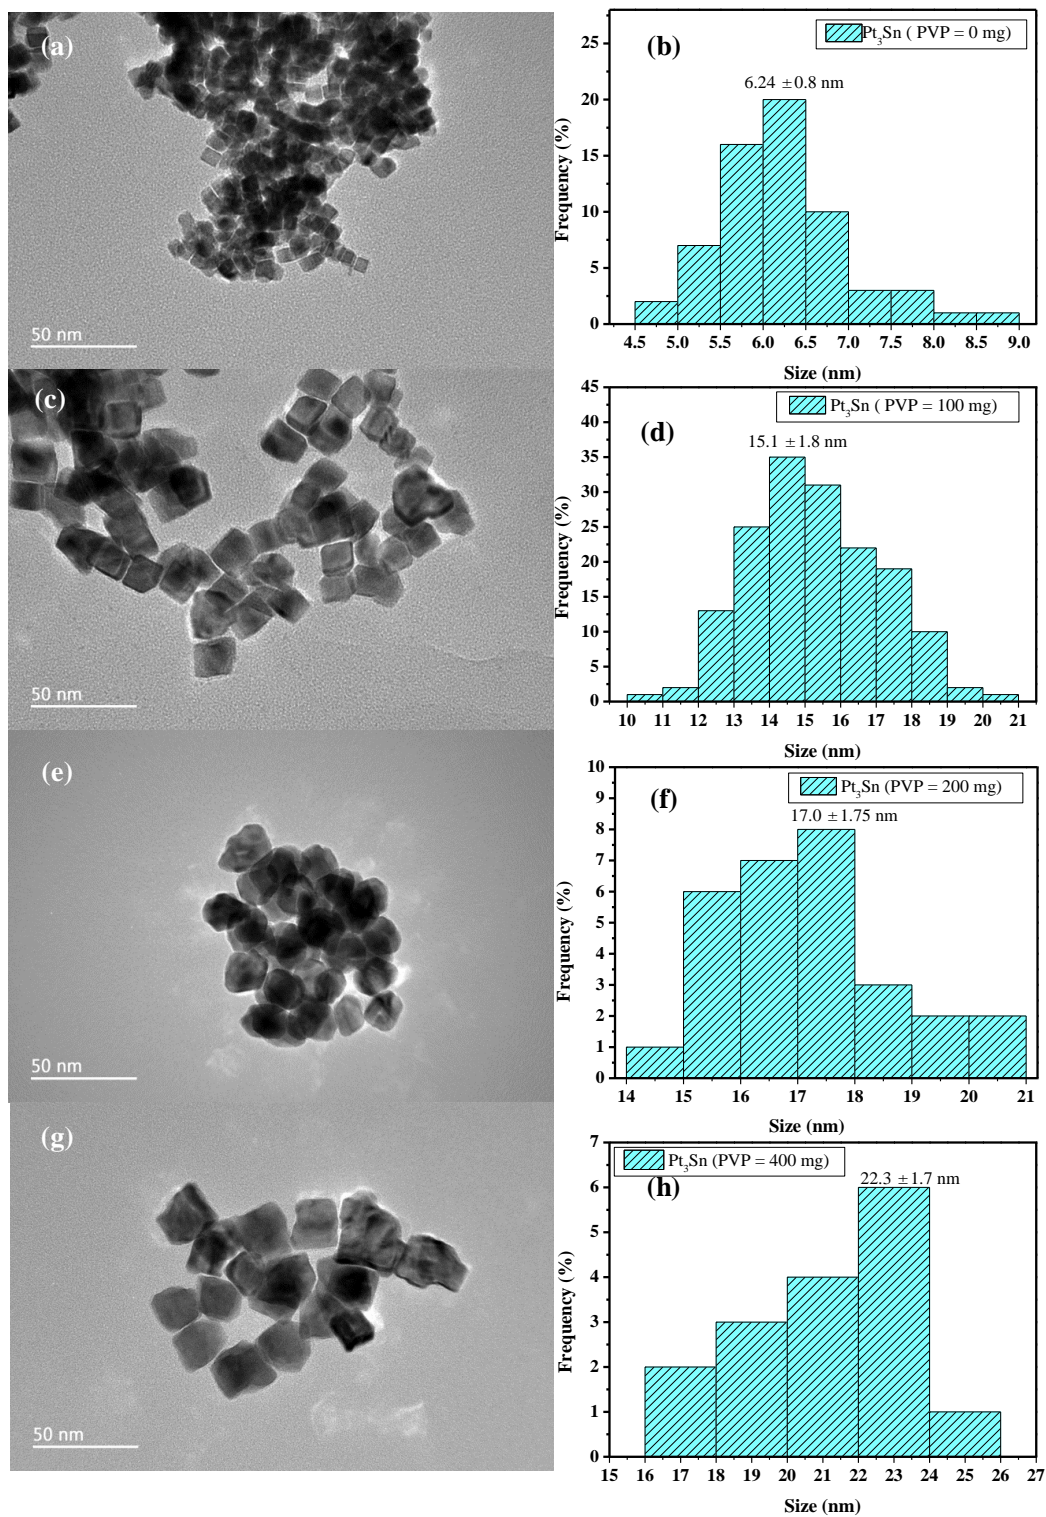

Figure S2. TEM images of Pt<sub>3</sub>Sn alloy nanocubes synthesized at different PVP additions:(a) 0 mg, (c) 100 mg, (e) 200 mg, and (g) 400 mg and the corresponding particle size distribution histograms (b), (d), (f) and (h), respectively.

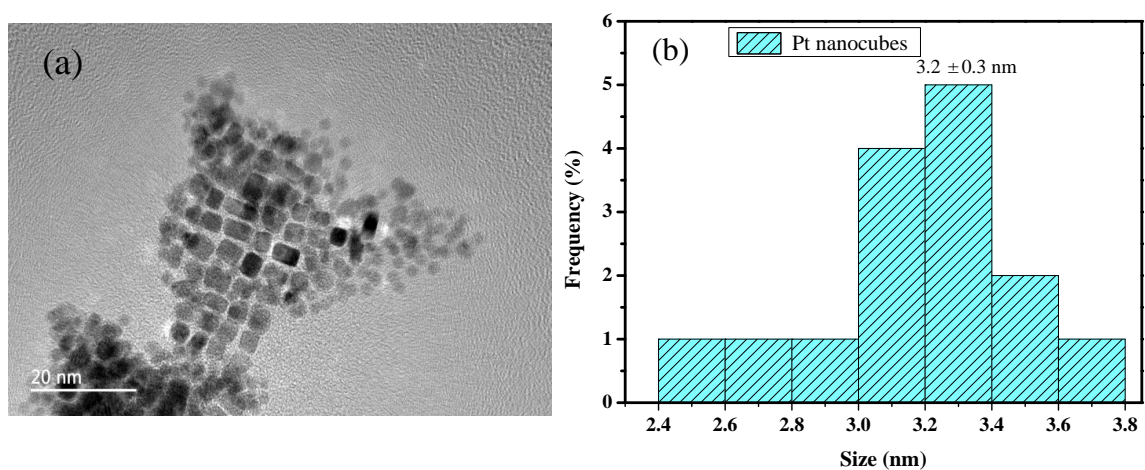

Figure S3. TEM image of Pt nanocubes (a) and particle size distribution histogram (b).

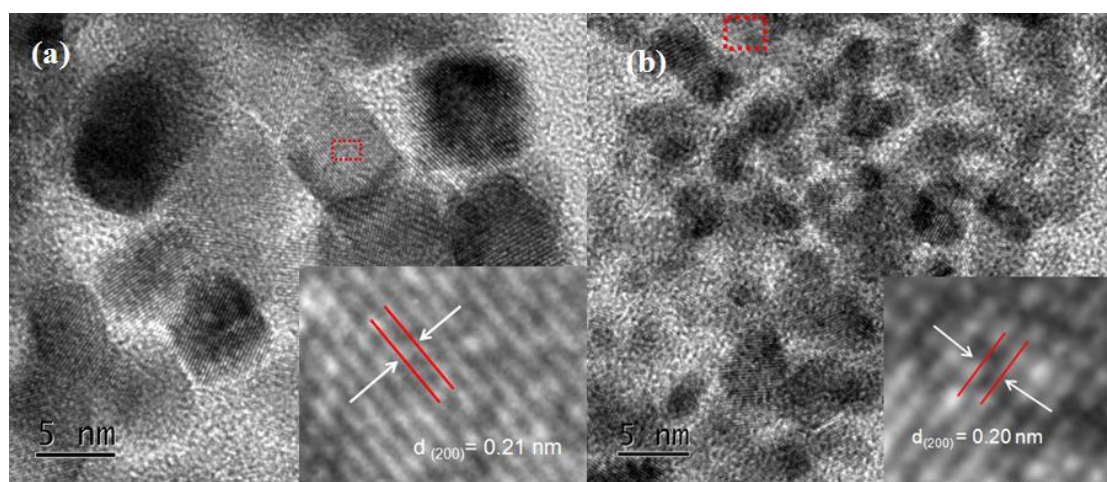

Figure S4. HRTEM images of Pt<sub>3</sub>Sn nanocubes (a) and Pt nanocubes (b). (The insets are the fringes of Pt<sub>3</sub>Sn and Pt crystal cells).

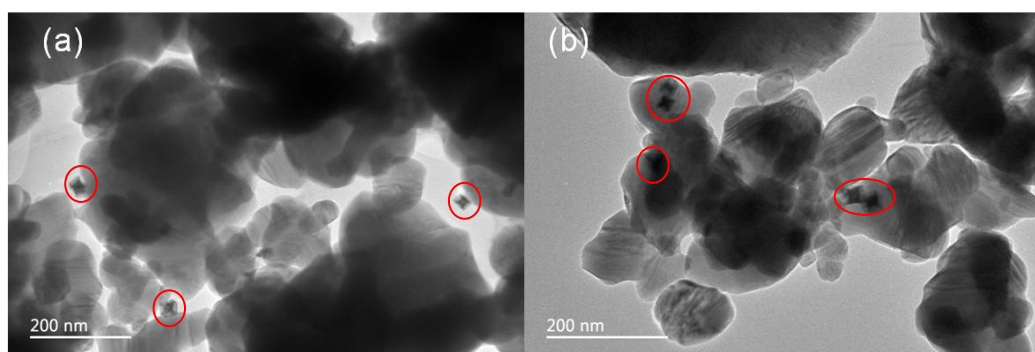

Figure S5. TEM images of 0.5 wt.% Pt<sub>3</sub>Sn/CdS photocatalyst (a) before and (b) after photocatalytic hydrogen production. The highlighted particles are excavated Pt<sub>3</sub>Sn nanocubes.



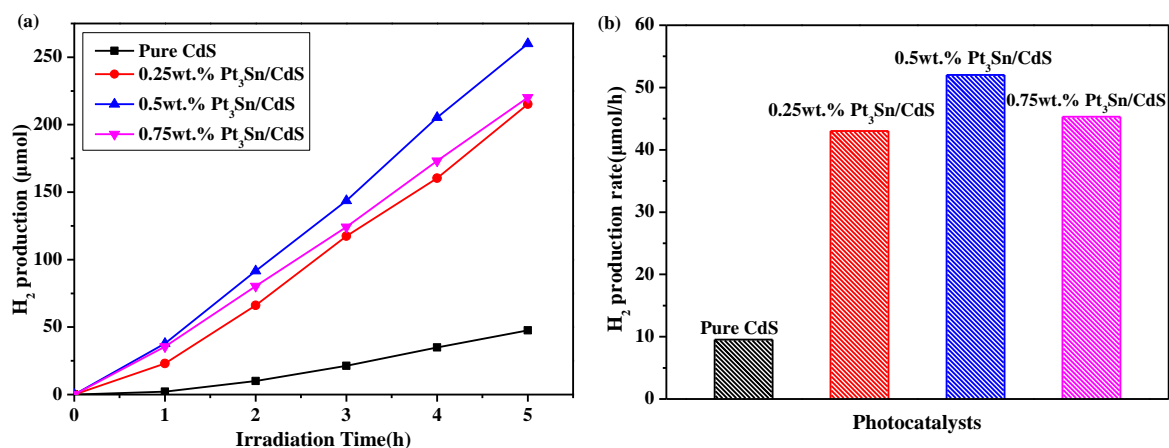

Figure S6. Hydrogen evolution (a) and hydrogen production rate histogram (b) for pure CdS, 0.25 wt.% excavated  $Pt_3Sn$  nanocubes/CdS, 0.5 wt.% excavated  $Pt_3Sn$  nanocubes/CdS and 0.75 wt.% excavated  $Pt_3Sn$  nanocubes/CdS. (Photocatalyst weight: 5.0 mg; Photolyte: 10 mL 1.25 M  $(NH_4)_2SO_3$  solution; Photolyte pH: 8.4; Light source: 300 W Xe light with a cut-off filter ( $\lambda > 420$  nm)).

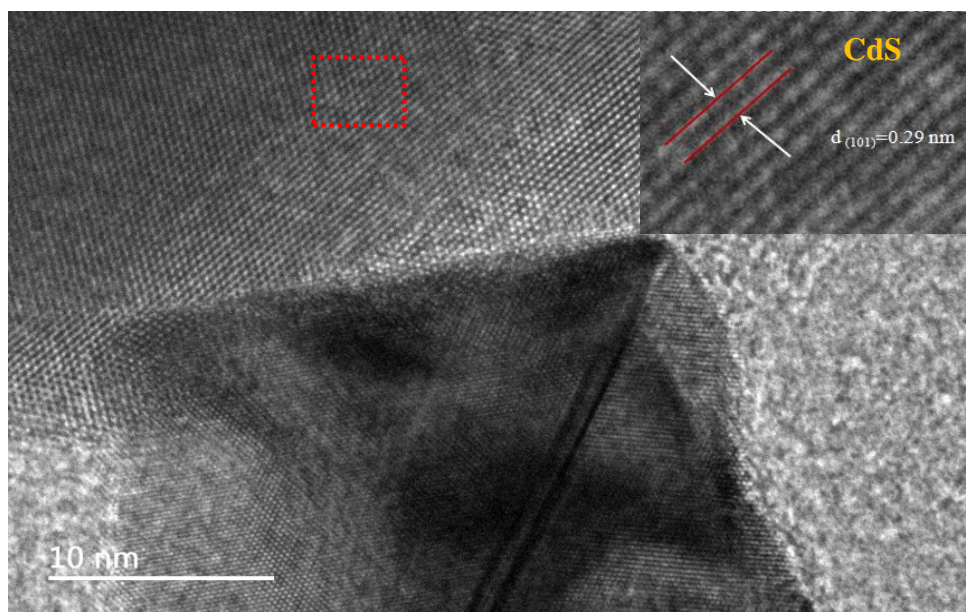

Figure S7. HRTEM images of an excavated  $Pt_3Sn$  nanocube loaded onto the surface of a CdS photocatalyst particle. The inset is the fringes of a CdS crystal.

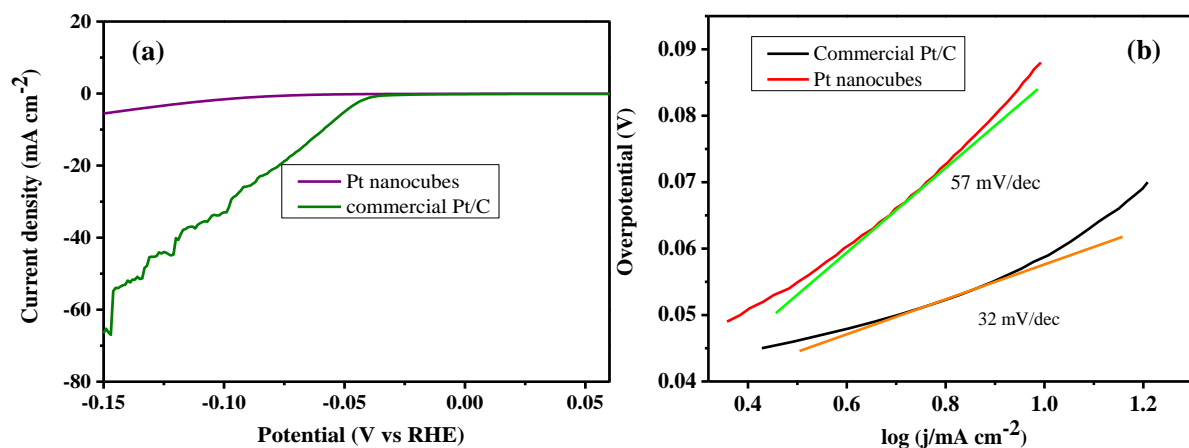

Figure S8. (a) Polarization curves of Pt nanocubes and commercial Pt/C at the same mass percent loading, (b) Tafel plot of commercial Pt/C. (Electrolyte: 0.5 M  $\text{H}_2\text{SO}_4$ , Scanning rate:  $2 \text{ mV s}^{-1}$ )

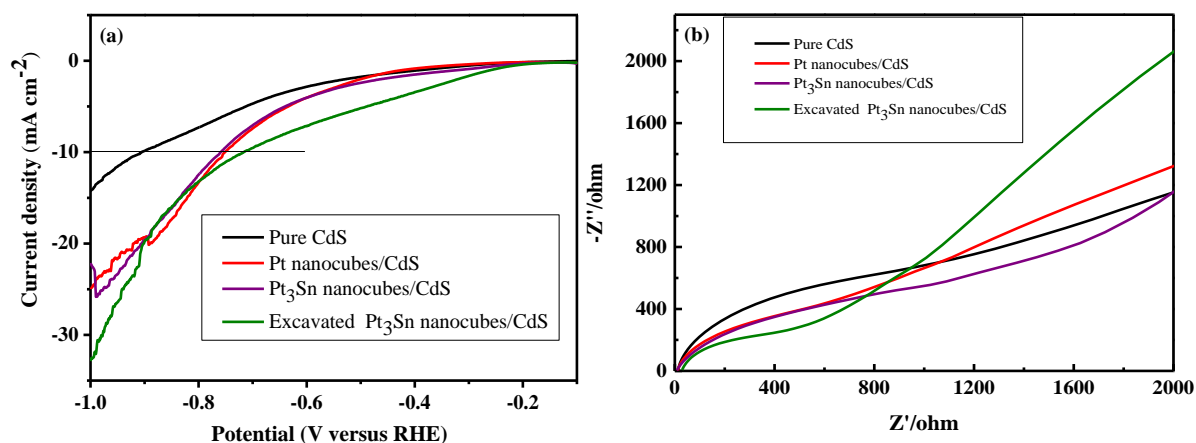

Figure S9. (a) Linear Scan Voltammetric (LSV) curves and (b) Electrochemical Impedance Spectra (EIS) for pure CdS, 0.5 wt.% Pt nanocubes/CdS, 0.5 wt.%  $\text{Pt}_3\text{Sn}$  nanocubes/CdS and 0.5 wt.% excavated  $\text{Pt}_3\text{Sn}$  nanocubes/CdS photocatalysts. (Electrolyte: 1.25 M  $(\text{NH}_4)_2\text{SO}_3$  aqueous solution; Electrolyte pH = 8.4; Light Source: visible light irradiation ( $\lambda > 420 \text{ nm}$ ); Scanning rate:  $2 \text{ mV s}^{-1}$ ; PVP addition: 300 mg).



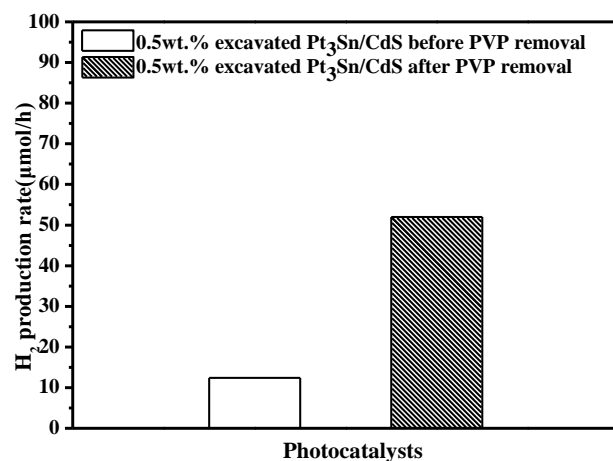

Figure S10. Hydrogen production rate histogram of 0.5 wt.% excavated Pt<sub>3</sub>Sn nanocubes/CdS before and after PVP removal.

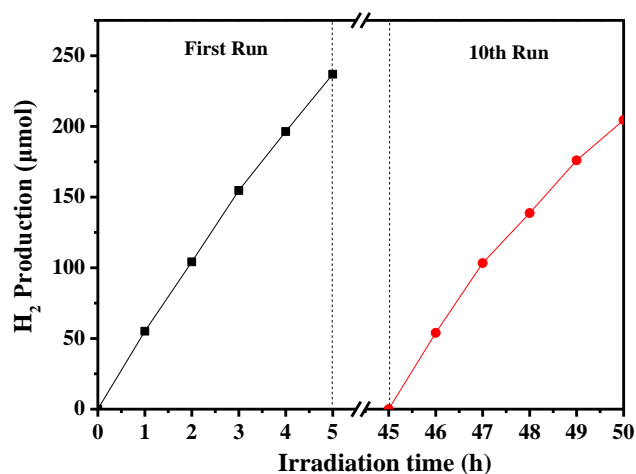

Figure S11. Cyclic lifespan tests for photocatalytic H<sub>2</sub> evolution via 0.5 wt.% excavated Pt<sub>3</sub>Sn nanocubes/CdS photocatalyst.

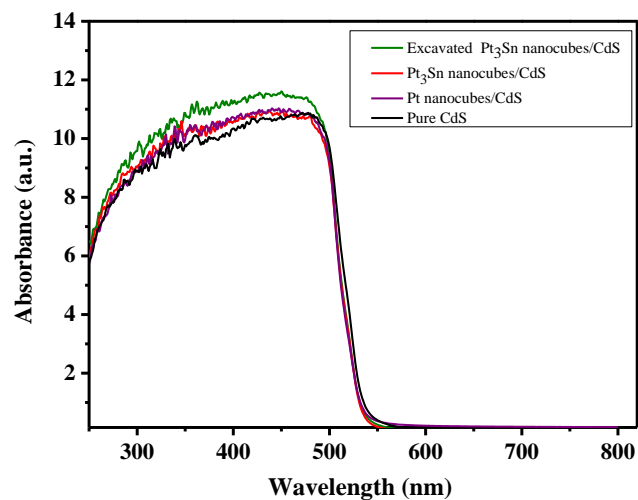

Figure S12. UV-Vis diffuse reflectance spectra (DRS) of pure CdS, 0.5 wt.% Pt nanocubes/CdS, 0.5wt.% Pt<sub>3</sub>Sn nanocubes/CdS and 0.5 wt.% excavated Pt<sub>3</sub>Sn nanocubes/CdS.

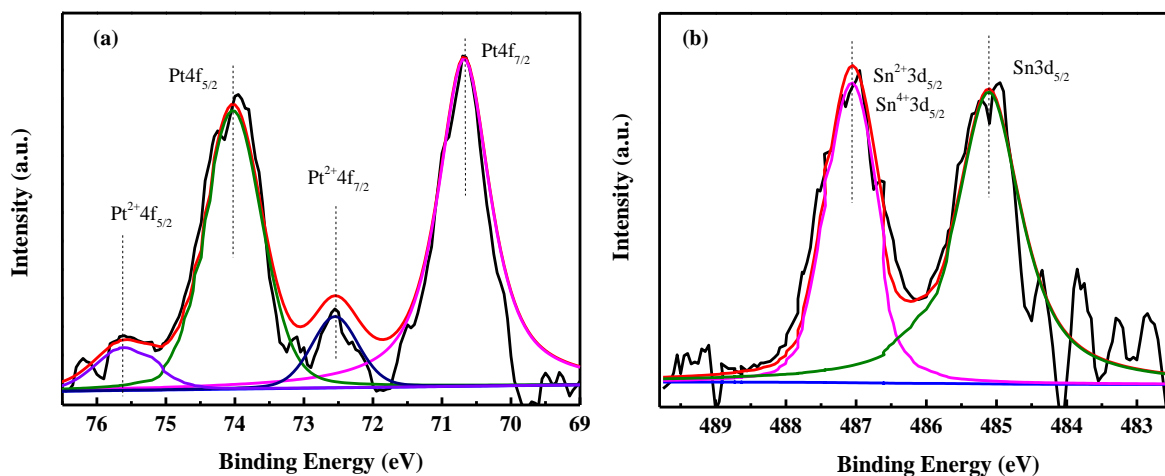

Figure S13. (a) Pt 4f and (b) Sn 3d XPS spectra of 0.5 wt.% excavated Pt<sub>3</sub>Sn nanocubes.

**Table S1.** Hydrogen production rates and quantum efficiencies for three Pt and Pt<sub>3</sub>Sn loaded CdS photocatalysts

| Photocatalyst                                                       | H <sub>2</sub> production rate (μmol/h) | QE (at 420 nm) (%) |
|---------------------------------------------------------------------|-----------------------------------------|--------------------|
| Bare CdS                                                            | 9.8                                     | 16                 |
| 0.5 wt. % Pt nanocubes/CdS (PVP = 300 mg)                           | 15                                      | 25                 |
| 0.5 wt. % Pt <sub>3</sub> Sn nanocubes/CdS (PVP = 0 mg)             | 26                                      | 43                 |
| 0.5 wt. % excavated Pt <sub>3</sub> Sn nanocubes/CdS (PVP = 300 mg) | 52                                      | 86                 |

**Table S2.** BET specific surface areas for Pt and Pt<sub>3</sub>Sn loaded CdS photocatalysts

| Photocatalyst                                                       | BET (m <sup>2</sup> /g) |
|---------------------------------------------------------------------|-------------------------|
| Bare CdS                                                            | 4.12                    |
| 0.5 wt. % Pt nanocubes/CdS (PVP = 300 mg)                           | 5.81                    |
| 0.5 wt. % excavated Pt <sub>3</sub> Sn nanocubes/CdS (PVP = 300 mg) | 4.88                    |

**Table S3.** Atomic ratios of Pt to Sn (Pt : Sn) in prepared Pt<sub>3</sub>Sn alloy nanocubes based on energy dispersive X-ray spectroscopy (EDS) and inductively coupled plasma atomic emission spectroscopy (ICP) measurements

| Photocatalyst                                   | Pt:Sn (EDS)         | Pt:Sn (ICP)         |
|-------------------------------------------------|---------------------|---------------------|
| 0.5 wt.% excavated Pt <sub>3</sub> Sn nanocubes | 77.1 : 22.9 (= 3.4) | 77.5 : 22.5 (= 3.4) |

**Table S4.** Summary of hydrogen production rates and quantum Efficiencies for CdS based photocatalysts

| CdS based photocatalyst               | Sacrificial Reagent                               | H <sub>2</sub> Production Rate               | Quantum Efficiency | Ref.               |
|---------------------------------------|---------------------------------------------------|----------------------------------------------|--------------------|--------------------|
| WS <sub>2</sub> -CdS(1-2 Layer)       | lactic acid                                       | 17730 $\mu\text{mol h}^{-1}\text{g}^{-1}$    | 67% at 420 nm      | Ref. <sup>3</sup>  |
| 4.0 wt.% WP/CdS                       | (NH <sub>4</sub> ) <sub>2</sub> SO <sub>3</sub>   | 155.17 $\mu\text{mol h}^{-1}\text{g}^{-1}$   | 10.2% at 420 nm    | Ref. <sup>4</sup>  |
| 10 wt.% MoS <sub>2</sub> /CdS         | lactic acid                                       | 49800 $\mu\text{mol h}^{-1}\text{g}^{-1}$    | 41.37% at 420 nm   | Ref. <sup>5</sup>  |
| Pt/CdS                                | sulfite                                           | 3 $\mu\text{mol h}^{-1}\text{g}^{-1}$        | 9.6% at 455 nm     | Ref. <sup>6</sup>  |
| Pd-NCs/CdS                            | (NH <sub>4</sub> ) <sub>2</sub> SO <sub>3</sub>   | 814 $\mu\text{mol h}^{-1}$                   | -----              | Ref. <sup>7</sup>  |
| Pt-decorated CdSe@CdS                 | 20 vol.% isopropyl alcohol                        | -----                                        | 27% at 455 nm      | Ref. <sup>8</sup>  |
| Pt-Pd/CdS                             | (NH <sub>4</sub> ) <sub>2</sub> SO <sub>3</sub>   | 1583 $\mu\text{mol}\cdot\text{h}^{-1}$       | 54.0% at 420 nm    | Ref. <sup>9</sup>  |
| NiS <sub>x</sub> /CdS                 | lactic acid                                       | 2.86 mmol h <sup>-1</sup>                    | 60.4% at 420 nm    | Ref. <sup>10</sup> |
| p-Au@CdS-TiO <sub>2</sub>             | Na <sub>2</sub> S-Na <sub>2</sub> SO <sub>3</sub> | -----                                        | -----              | Ref. <sup>11</sup> |
| 4.2 wt% CdS/WS <sub>2</sub> /graphene | Na <sub>2</sub> S-Na <sub>2</sub> SO <sub>3</sub> | 1842 $\mu\text{mol h}^{-1}\text{g}^{-1}$     | 21.2% at 420 nm    | Ref. <sup>12</sup> |
| Pt-PdS/CdS                            | Na <sub>2</sub> S-Na <sub>2</sub> SO <sub>3</sub> | -----                                        | 93% at 420 nm      | Ref. <sup>13</sup> |
| 0.5 wt.% Pt <sub>3</sub> Sn/CdS       | (NH <sub>4</sub> ) <sub>2</sub> SO <sub>3</sub>   | 24522.71 $\mu\text{mol h}^{-1}\text{g}^{-1}$ | 86% at 420 nm      | This work          |

## Computational Details

The entropies of the gaseous molecules in this research were taken from the National Institute of Standards and Technology (NIST) Chemistry Webbook 6. The zero-point energy (ZPE) was calculated according to:

$$E_{ZPE} = \sum_{i=1}^{3N} \frac{h\nu_i}{2}$$

The entropy change for adsorbed intermediates was calculated within the harmonic approximation:

$$\Delta S_{ads}(0 \rightarrow T, P^0) = S_{vib} = \sum_{i=1}^{3N} \left[ \frac{N_A h\nu_i}{T(e^{h\nu_i/k_B T} - 1)} - R \ln(1 - e^{-h\nu_i/k_B T}) \right]$$

Where:  $\nu_i$  is DFT-calculated normal-mode frequency for species of  $3N$  degrees of freedom ( $N$  = number of atoms that are adsorbed on Pt (100), Pt<sub>3</sub>Sn (100), Pt (110) and Pt<sub>3</sub>Sn (110) surfaces),  $N_A$  is the Avogadro's constant ( $6.022 \times 10^{23} \text{ mol}^{-1}$ ),  $h$  is Planck's constant ( $6.626 \times 10^{-34} \text{ J} \cdot \text{s}$ ),  $k_B$  is the Boltzmann constant ( $1.38 \times 10^{-23} \text{ J} \cdot \text{K}^{-1}$ ),  $R$  is the ideal gas constant ( $8.314 \text{ J} \cdot \text{K}^{-1} \text{ mol}^{-1}$ ), and  $T$  is the system temperature ( $=298 \text{ }^\circ\text{K}$  in this work).

**Table S5.** Comparison of the calculated adsorption energies (in eV) of H\* on Pt (100), Pt (110), Pt<sub>3</sub>Sn (100), Pt<sub>3</sub>Sn (110) facets

| H adsorption Site     | Pt (100)              | Pt (110)      | Pt <sub>3</sub> Sn (100) | Pt <sub>3</sub> Sn (110) |
|-----------------------|-----------------------|---------------|--------------------------|--------------------------|
| 3F                    | –                     | -0.58 [T(Pt)] | –                        | <b>-0.29</b>             |
| 4F                    | -0.71[B] <sup>a</sup> | –             | -0.63[T(Pt)]             | –                        |
| T(Pt)                 | -0.53                 | -0.58         | <b>-0.63</b>             | -0.28[3F]                |
| T(Sn)                 | –                     | –             | 0.65                     | 0.57                     |
| B(Pt-Pt)              | <b>-0.71</b>          | <b>-0.61</b>  | –                        | 0.70                     |
| B(Pt <sub>3</sub> Sn) | –                     | –             | -0.63[T(Pt)]             | -0.28[3F]                |

<sup>a</sup> Sites in the brackets represent the final optimized adsorption sites.

**Table S6.** Lattice constants (a) of optimized Pt and Pt<sub>3</sub>Sn unit cell and 2 $\theta$  measured from simulated XRD compared with experimental XRD data.

|                    | 2 $\theta$ ( $^{\circ}$ ) |                    | $\Delta(2\theta)$ ( $^{\circ}$ ) |              |
|--------------------|---------------------------|--------------------|----------------------------------|--------------|
|                    | Pt                        | Pt <sub>3</sub> Sn | Calculated                       | Experimental |
| a ( $\text{\AA}$ ) | 3.98                      | 4.06               | –                                | –            |
| (111)              | 39.20                     | 38.35              | 0.85                             | 0.82         |
| (200)              | 45.60                     | 44.60              | 1.00                             | 0.97         |
| (220)              | 66.45                     | 64.85              | 1.60                             | 1.49         |
| (311)              | 79.95                     | 77.90              | 2.05                             | 1.94         |
| (222)              | 84.30                     | 82.10              | 2.20                             | 2.06         |

## References:

- (1) Luo, M.; Hong, Y.; Yao, W.; Huang, C.; Xu, Q.; Wu, Q. Facile Removal of Polyvinylpyrrolidone (PVP) Adsorbates from Pt Alloy Nanoparticles. *J. Mater. Chem. A* **2015**, *3* (6), 2770-2775.
- (2) Chen, Q.; Yang, Y.; Cao, Z.; Kuang, Q.; Du, G.; Jiang, Y.; Xie, Z.; Zheng, L. Excavated Cubic Platinum-Tin Alloy Nanocrystals Constructed from Ultrathin Nanosheets with Enhanced Electrocatalytic Activity. *Angew. Chem. Int. Ed.* **2016**, *55* (31), 9021-9025.
- (3) Xu, D.; Xu, P.; Zhu, Y.; Peng, W.; Li, Y.; Zhang, G.; Zhang, F.; Mallouk, T. E.; Fan, X. High Yield Exfoliation of WS<sub>2</sub> Crystals into 1–2 Layer Semiconducting Nanosheets and Efficient Photocatalytic Hydrogen Evolution from WS<sub>2</sub>/CdS Nanorod Composites. *ACS Appl. Mater. Interfaces* **2018**, *10*, 2810-2818.
- (4) Zhang, J.; Yao, W.; Huang, C.; Shi, P.; Xu, Q. High Efficiency and Stable Tungsten Phosphide Cocatalysts for Photocatalytic Hydrogen Production. *J. Mater. Chem. A* **2017**, *5* (24), 12513-12519.
- (5) Yin, X.L.; Li, L.L.; Jiang, W.J.; Zhang, Y.; Zhang, X.; Wan, L.J.; Hu, J.S. MoS<sub>2</sub>/CdS Nanosheets-on-Nanorod Heterostructure for Highly Efficient Photocatalytic H<sub>2</sub> Generation under Visible Light Irradiation. *ACS Appl. Mater. Interfaces* **2016**, *8* (24), 15258-15266.
- (6) Subbaraman, R.; Tripkovic, D.; Strmcnik, D.; Chang, K. C.; Uchimura, M.; Paulikas, A. P.; Stamenkovic, V.; Markovic, N. M. Enhancing Hydrogen Evolution Activity in Water Splitting by Tailoring Li<sup>+</sup>-Ni(OH)<sub>2</sub>-Pt Interfaces. *Science* **2011**, *334* (6060), 1256-1260.
- (7) Luo, M.; Yao, W.; Huang, C.; Wu, Q.; Xu, Q. Shape-controlled Synthesis of Pd Nanoparticles for Effective Photocatalytic Hydrogen Production. *RSC Adv.* **2015**, *5* (51), 40892-40898.
- (8) Nakibli, Y.; Kalisman, P.; Amirav, L. Less Is More: The Case of Metal Cocatalysts. *J. Phys. Chem. Lett.* **2015**, *6* (12), 2265-2268.
- (9) Luo, M.; Lu, P.; Yao, W.; Huang, C.; Xu, Q.; Wu, Q.; Kuwahara, Y.; Yamashita, H. Shape and Composition Effects on Photocatalytic Hydrogen Production for Pt–Pd Alloy Cocatalysts. *ACS Appl. Mater. Interfaces* **2016**, *8* (32), 20667-20674.
- (10) Qin, Z.; Chen, Y.; Wang, X.; Guo, X.; Guo, L. Intergrowth of Cocatalysts with Host Photocatalysts for Improved Solar-to-Hydrogen Conversion. *ACS Appl. Mater. Interfaces* **2016**, *8* (2), 1264-1272.
- (11) Tong, R.; Liu, C.; Xu, Z.; Kuang, Q.; Xie, Z.; Zheng, L. Efficiently Enhancing Visible Light Photocatalytic Activity of Faceted TiO<sub>2</sub> Nanocrystals by Synergistic Effects of Core–Shell Structured Au@CdS Nanoparticles and Their Selective Deposition. *ACS Appl. Mater. Interfaces* **2016**, *8* (33), 21326-21333.
- (12) Xiang, Q.; Cheng, F.; Lang, D. Hierarchical Layered WS<sub>2</sub>/Graphene-Modified CdS Nanorods for Efficient Photocatalytic Hydrogen Evolution. *ChemSusChem* **2016**, *9* (9), 996-1002.
- (13) Yang, J.; Yan, H.; Wang, X.; Wen, F.; Wang, Z.; Fan, D.; Shi, J.; Li, C. Roles of Cocatalysts in Pt–PdS/CdS with Exceptionally High Quantum Efficiency for Photocatalytic Hydrogen Production. *J. Catal.* **2012**, *290*, 151-157.
